# Supplementary material for: Association between social deprivation and disease activity in rheumatoid arthritis: a systematic literature review
Source: PubMed Central journal article supplement — RMD Open. 2022 Apr 21;8(1):e002058. doi: 10.1136/rmdopen-2021-002058 (PMC9024227; doi:10.1136/rmdopen-2021-002058), 2022-04-21
Supplement: rmdopen-2021-002058supp002.pdf [file rmdopen-2021-002058supp002.pdf]

Supplementary Table 1- Risk of bias (Newcastle-Ottawa Scale)

| Author/Year                       | Type of study   | Selection                                |                                     |                           |                                                                          | Comparability                                                   | Outcome               |                                                 |                                  |
|-----------------------------------|-----------------|------------------------------------------|-------------------------------------|---------------------------|--------------------------------------------------------------------------|-----------------------------------------------------------------|-----------------------|-------------------------------------------------|----------------------------------|
|                                   |                 | Representativeness of the exposed cohort | Selection of the non-exposed cohort | Ascertainment of exposure | Demonstration that outcome of interest was not present at start of study | Comparability of cohorts on the basis of the design or analysis | Assessment of outcome | Was follow-up long enough for outcomes to occur | Adequacy of follow up of cohorts |
| Alarcón 2014 (21)                 | cross-sectional |                                          | *                                   |                           |                                                                          | *                                                               |                       | *                                               | *                                |
| Andersson 2013 (39)               | cohort          | *                                        | *                                   |                           | *                                                                        | *                                                               | *                     | *                                               | *                                |
| ERAS study group (Young) 2000 (3) | cohort          | *                                        | *                                   | *                         | *                                                                        | *                                                               | *                     | *                                               | *                                |
| Baldassari 2014 (30)              | cross-sectional | *                                        | *                                   |                           |                                                                          | *                                                               |                       | *                                               | *                                |
| Barton 2011 (31)                  | cross-sectional | *                                        |                                     |                           |                                                                          | *                                                               | *                     | *                                               | *                                |
| Berkanovic 1996 (32)              | cross-sectional |                                          | *                                   |                           |                                                                          |                                                                 |                       | *                                               |                                  |
| Brekke 1999 (38)                  | cross-sectional | *                                        | *                                   | *                         |                                                                          |                                                                 |                       | *                                               |                                  |
| Callhoff 2017 (33)                | cross-sectional |                                          | *                                   |                           |                                                                          | *                                                               |                       | *                                               |                                  |
| Camacho 2012 (16)                 | cohort (NOAR)   | *                                        | *                                   | *                         | *                                                                        | *                                                               | *                     | *                                               | *                                |
| Chandrashekara 2018 (34)          | cross-sectional | *                                        | *                                   |                           |                                                                          | *                                                               | *                     | *                                               | *                                |
| Clave-Testino 1994 (23)           | case-control    | *                                        | *                                   |                           | *                                                                        | *                                                               |                       |                                                 |                                  |
| Gamboa-Cardenas 2019 (14)         | cohort          | *                                        | *                                   |                           |                                                                          | *                                                               |                       |                                                 |                                  |
| Gong 2016 (35)                    | cross-sectional |                                          | *                                   |                           |                                                                          |                                                                 |                       |                                                 |                                  |
| Hallert 2015 (36)                 | cohort          | *                                        | *                                   |                           |                                                                          |                                                                 | *                     |                                                 |                                  |
| Harrison 2009 (17)                | cohort (NOAR)   | *                                        | *                                   | *                         | *                                                                        | *                                                               | *                     | *                                               | *                                |
| Harrison 2005 (1)                 | cohort          | *                                        | *                                   | *                         | *                                                                        | *                                                               | *                     | *                                               | *                                |
| Jacobi 2003 (4)                   | cohort          |                                          | *                                   |                           |                                                                          | *                                                               | *                     | *                                               |                                  |
| Jiang 2015 (24)                   | cohort          | *                                        | *                                   |                           | *                                                                        | *                                                               | *                     | *                                               | *                                |
| Kearsley-Fleet 2018 (18)          | cohort          | *                                        | *                                   | *                         | *                                                                        | *                                                               | *                     | *                                               | *                                |
| Linde 2009 (25)                   | cohort          | *                                        | *                                   |                           |                                                                          | *                                                               |                       | *                                               | *                                |
| Massardo 2012 (15)                | cohort          | *                                        | *                                   | *                         | *                                                                        | *                                                               | *                     | *                                               | *                                |
| McEntegart 1997 (2)               | cohort          | *                                        | *                                   | *                         | *                                                                        | *                                                               | *                     | *                                               | *                                |
| Molina 2015 (20)                  | cohort          | *                                        | *                                   | *                         |                                                                          | *                                                               | *                     | *                                               | *                                |
| Moufarrej 2015 (22)               | cross-sectional |                                          |                                     |                           |                                                                          |                                                                 |                       |                                                 | *                                |
| Putrik 2016 (26)                  | cohort          | *                                        | *                                   | *                         | *                                                                        | *                                                               | *                     | *                                               | *                                |

|                      |        |   |   |   |   |   |   |   |   |
|----------------------|--------|---|---|---|---|---|---|---|---|
| Roodenrijs 2020 (27) | cohort | * | * |   |   | * | * | * | * |
| Vlieland 1994 (28)   | cohort |   | * |   |   | * |   | * |   |
| Yang 2015 (37)       | cohort | * | * | * | * | * | * | * | * |
| Yates 2021 (19)      | cohort | * | * | * | * | * | * | * | * |
| Zou 2020 (29)        | cohort | * | * | * |   |   |   | * | * |
